# Supplementary material for: Unlocking the potential of rice bran through extrusion: a systematic review
Source: Royal Society of Chemistry journal article supplement (doi:10.1039/d4fb00027g), 2024-01-01
Supplement: d4fb00027g1.pdf [file d4fb00027g1.pdf]

### Supplementary files

**Table S1:** Details of the search for Preferred Reporting Items for Systematic Reviews and Meta-Analysis (PRISMA)

| Database       | weblink                                                                                                                                                                                                                                                                                                                                                                                                                                                                                                                                                                                                                                                                                                                                                                                                                                                                                           | Search string                                                                                                                     | Total papers<br>Search date: 26 <sup>th</sup><br>April 2023 | Total papers<br>Search date: 4 <sup>th</sup><br>November 2023 |
|----------------|---------------------------------------------------------------------------------------------------------------------------------------------------------------------------------------------------------------------------------------------------------------------------------------------------------------------------------------------------------------------------------------------------------------------------------------------------------------------------------------------------------------------------------------------------------------------------------------------------------------------------------------------------------------------------------------------------------------------------------------------------------------------------------------------------------------------------------------------------------------------------------------------------|-----------------------------------------------------------------------------------------------------------------------------------|-------------------------------------------------------------|---------------------------------------------------------------|
| Google Scholar | <a href="https://scholar.google.com/scholar?hl=en&amp;as_sdt=0%2C5&amp;q=%22rice+bran%22+AND+%22extrusion%22&amp;oq=">https://scholar.google.com/scholar?hl=en&amp;as_sdt=0%2C5&amp;q=%22rice+bran%22+AND+%22extrusion%22&amp;oq=</a>                                                                                                                                                                                                                                                                                                                                                                                                                                                                                                                                                                                                                                                             | "rice bran" AND "extrusion"                                                                                                       | 9010                                                        | 9820                                                          |
| PubMed         | <a href="https://pubmed.ncbi.nlm.nih.gov/?term=%28extrusion%5BTitle%2FAbstract%5D%29+AND+%28rice+bran%5BTitle%2FAbstract%5D%29&amp;sort=">https://pubmed.ncbi.nlm.nih.gov/?term=%28extrusion%5BTitle%2FAbstract%5D%29+AND+%28rice+bran%5BTitle%2FAbstract%5D%29&amp;sort=</a>                                                                                                                                                                                                                                                                                                                                                                                                                                                                                                                                                                                                                     | (extrusion[Title/Abstract]) AND (rice bran[Title/Abstract])                                                                       | 21                                                          | 22                                                            |
| ScienceDirect  | <a href="https://www.sciencedirect.com/search?q=%22rice%20bran%22%20AND%20%22extrusion%22&amp;articleTypes=FLA&amp;lastSelectedFacet=articleTypes">https://www.sciencedirect.com/search?q=%22rice%20bran%22%20AND%20%22extrusion%22&amp;articleTypes=FLA&amp;lastSelectedFacet=articleTypes</a>                                                                                                                                                                                                                                                                                                                                                                                                                                                                                                                                                                                                   | "rice bran" AND "extrusion"                                                                                                       | 447                                                         | 485                                                           |
| Scopus         | <a href="https://www.scopus.com/results/results.uri?sort=plf-f&amp;src=s&amp;sid=f283e2bc3da2674703631aeb319251e1&amp;sot=a&amp;sdt=a&amp;cluster=scosubtype%2C%22ch%22%2Cf%2C%22re%22%2Cf&amp;sl=64&amp;s=%28+TITLE-ABS-KEY+%28+rice+AND+bran+%29+AND+TITLE-ABS-KEY+%28+extru*+%29+%29&amp;origin=searchadvanced&amp;editSaveSearch=&amp;txGid=3de6904e29119ba4eade8fbe328da940&amp;sessionSearchId=f283e2bc3da2674703631aeb319251e1&amp;limit=10">https://www.scopus.com/results/results.uri?sort=plf-f&amp;src=s&amp;sid=f283e2bc3da2674703631aeb319251e1&amp;sot=a&amp;sdt=a&amp;cluster=scosubtype%2C%22ch%22%2Cf%2C%22re%22%2Cf&amp;sl=64&amp;s=%28+TITLE-ABS-KEY+%28+rice+AND+bran+%29+AND+TITLE-ABS-KEY+%28+extru*+%29+%29&amp;origin=searchadvanced&amp;editSaveSearch=&amp;txGid=3de6904e29119ba4eade8fbe328da940&amp;sessionSearchId=f283e2bc3da2674703631aeb319251e1&amp;limit=10</a> | ( TITLE-ABS-KEY ( rice AND bran ) AND TITLE-ABS-KEY ( extru* ) ) AND ( EXCLUDE ( DOCTYPE , "ch" ) OR EXCLUDE ( DOCTYPE , "re" ) ) | 177                                                         | 187                                                           |
| Web of Science | <a href="https://www.webofscience.com/wos/woscc/summary/88d1bdd2-42be-47e6-989e-b0fa9733edcc-8564f77d/relevance/1">https://www.webofscience.com/wos/woscc/summary/88d1bdd2-42be-47e6-989e-b0fa9733edcc-8564f77d/relevance/1</a>                                                                                                                                                                                                                                                                                                                                                                                                                                                                                                                                                                                                                                                                   | extrusion (Topic) AND rice bran (Topic) and Review Article (Exclude – Document Types: Review article)                             | 171                                                         | 175                                                           |
|                |                                                                                                                                                                                                                                                                                                                                                                                                                                                                                                                                                                                                                                                                                                                                                                                                                                                                                                   |                                                                                                                                   | 9,826                                                       | 10,689                                                        |

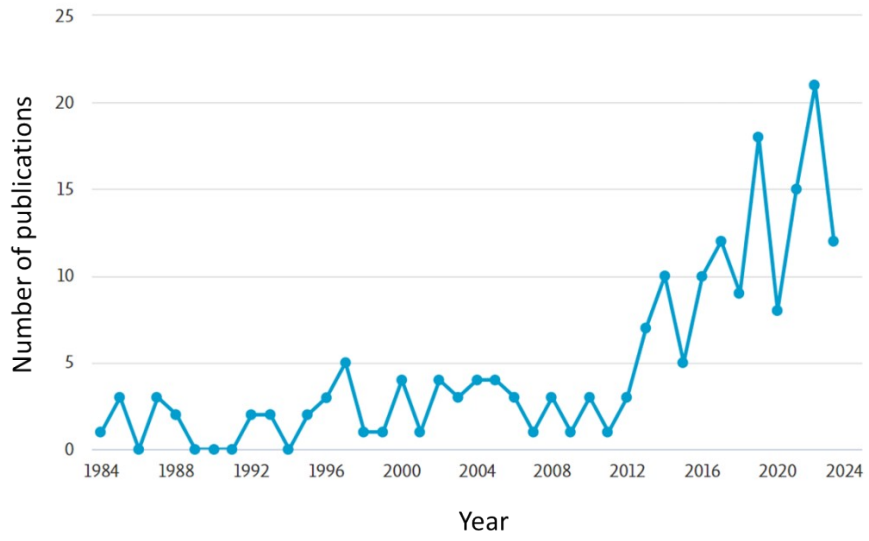

(a)

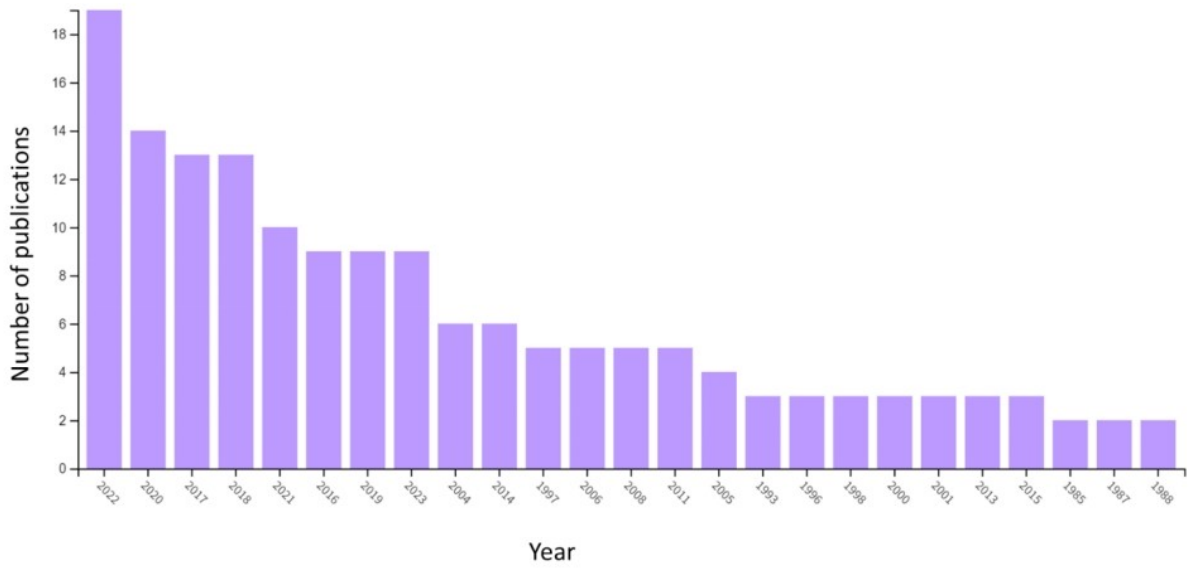

(b)

**Figure S1** Number of publications related to rice bran extrusion by year **(a)** data from Scopus **(b)** data from web of science

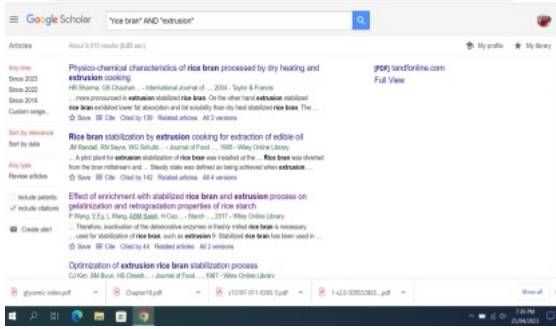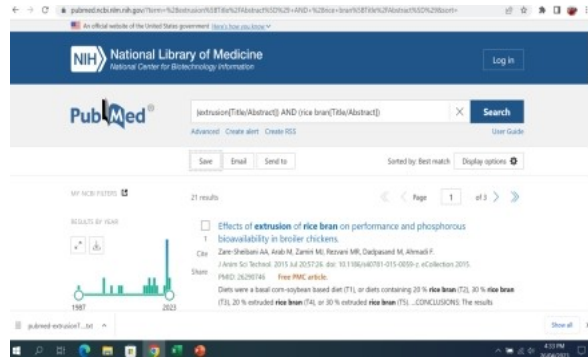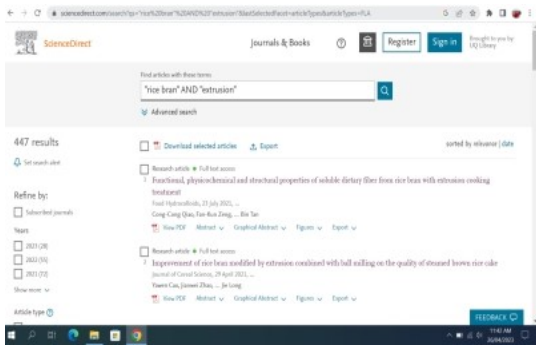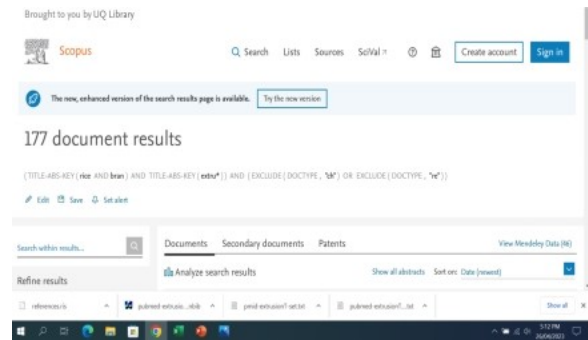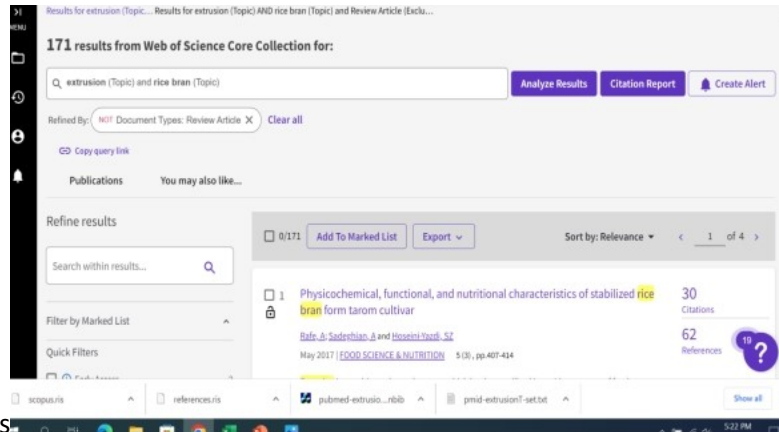

Plate 1 Screenshots for the searches from different data base on Search date: 26<sup>th</sup> April 2023
